# Supplementary material
Source: PubMed Central journal article supplement (PMC7024674)
Supplement: NIHMS1548820-supplement-1.pdf [file NIHMS1548820-supplement-1.pdf]

## SUPPORTING INFORMATION

### **Thermal aggregates of human mortalin and Hsp70-1A behave as supramolecular assemblies**

**Authors:** Vanessa T.R. Kiraly<sup>1#</sup>; Paulo R. Dores-Silva<sup>1,3#</sup>; Vitor H.B. Serrão<sup>2</sup>, David M. Cauvi<sup>3</sup>; Antonio De Maio<sup>3,4,5</sup>; Júlio C. Borges<sup>1\*</sup>

**Affiliation:** <sup>1</sup> São Carlos Institute of Chemistry, University of São Paulo, São Carlos, SP, Brazil.

<sup>2</sup> Department Laboratory of Medicine and Pathobiology, University of Toronto, Toronto, ON, Canada.

<sup>3</sup> Department of Surgery, School of Medicine University of California, La Jolla, USA.

<sup>4</sup> Center for Investigations of Health and Education Disparities, University of California, San Diego, La Jolla, USA.

<sup>5</sup> Department of Neurosciences, School of Medicine, University of California, La Jolla, USA.

§ \*To whom correspondence should be addressed: Júlio C. Borges; Instituto de Química de São Carlos, Universidade de São Paulo – USP, P.O. Box 780 – Zip Code 13560-970 – São Carlos, SP, Brazil, Phone: 55-16-3373-8637; Fax 55-16-3373-9982; E-mail: borgesjc@iqsc.usp.br.

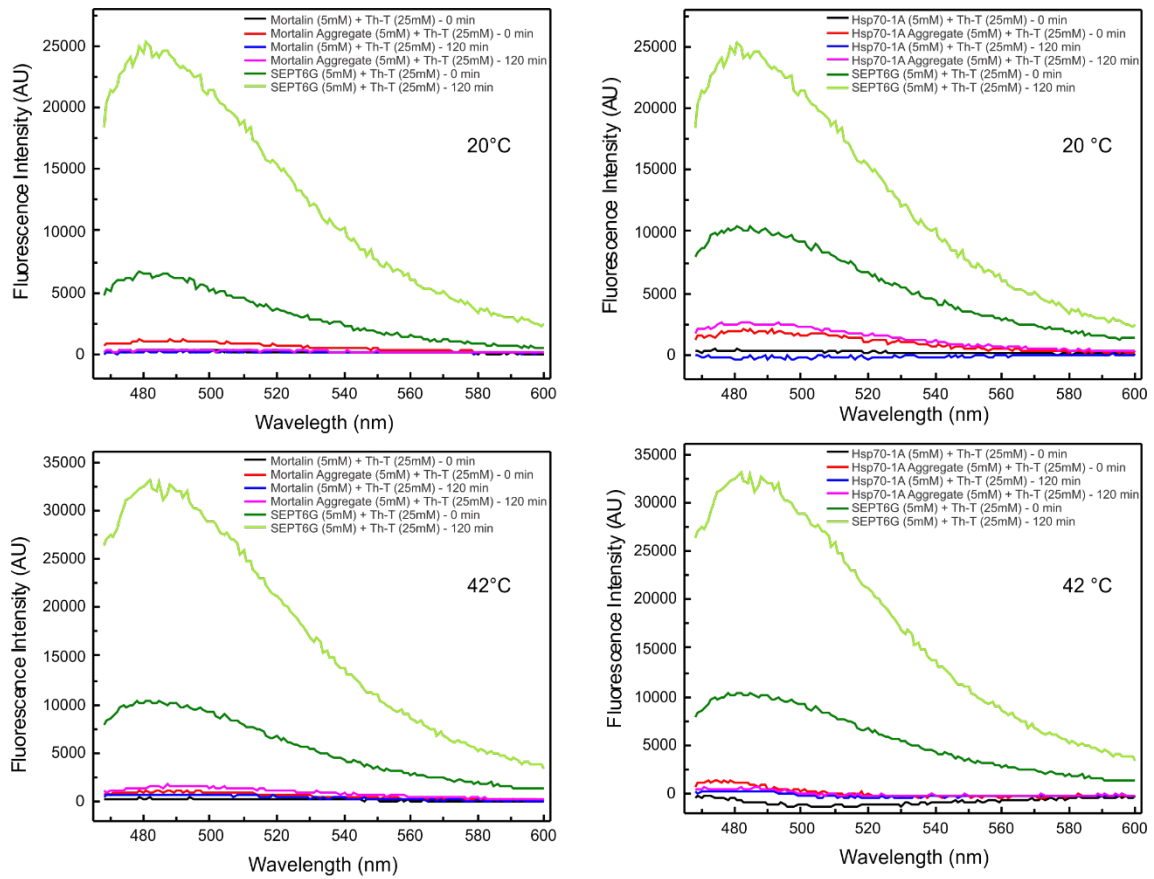

**Figure S1: Thioflavin-T (Th-T) assay.** The experiment was performed in a Varioskan™ Lux Microplate Reader (Thermofisher), using a microlon microplate of 96 well (Greiner), with mortalin, Hsp70-1A and their thermic aggregates solved in TKP buffer at concentration of  $5 \mu\text{mol L}^{-1}$ , with addition of  $25 \mu\text{mol L}^{-1}$  of Th-T. SEPT6G (Kumagai et al., 2019) was used as positive control, in the same conditions of the recombinant proteins. Measurements were performed exposing the samples at temperatures of  $20 \text{ }^\circ\text{C}$  and  $40 \text{ }^\circ\text{C}$  for 120 min. The fluorescence emission spectra were measured from 468 to 600 nm, after excitation at 450 nm (Alam et al., 2019; Furkan et al., 2019; Majid et al., 2019). Fluorescence signal indicated that both mortalin and Hsp70-1A aggregates do not form amyloid like structures since the signal around 482 nm is low in comparison to the SEPT6G one.

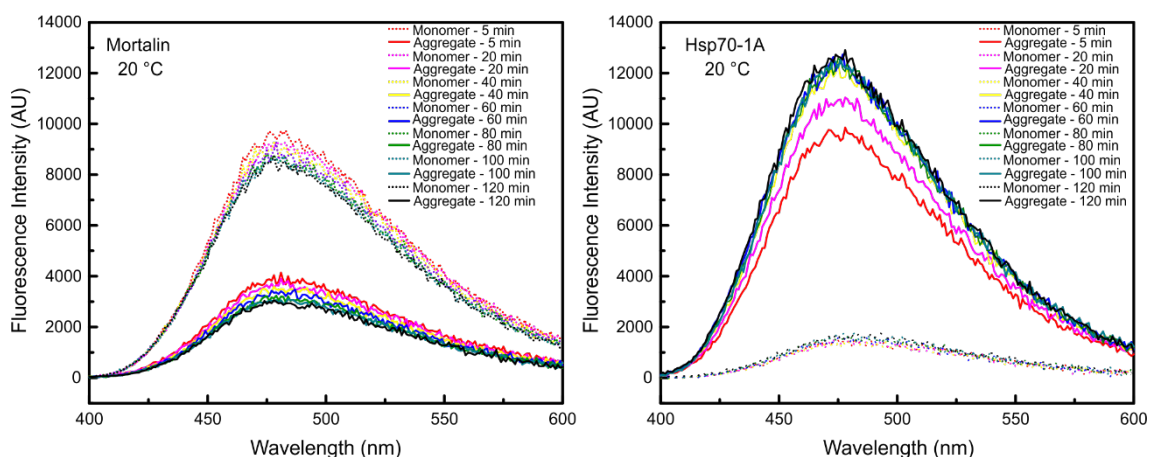

**Figure S2: ANS fluorescence assay.** Experiment was performed on a Varioskan™ Lux Microplate Reader (Thermofisher), using a microolon microplate of 96 well (Greiner). Mortalin, Hsp70-1A and their aggregates at  $5 \mu\text{mol L}^{-1}$  solved in TKP buffer in the presence of  $30 \mu\text{mol L}^{-1}$  of ANS were tested in a time dependent manner, with data collection at 5, 20, 40, 60, 80, 100 and 120 min. Experiments were conducted at  $20 \text{ }^\circ\text{C}$ , measuring fluorescence emission from 400 to 600 nm after excitation at 350 nm (Alam et al., 2019; Furkan et al., 2019). Results indicate that ANS interacts with both mortalin and Hsp70-1A and their aggregates, presenting maximum of fluorescence around 475 nm with minor dependence on the time.

## References

- Alam, P., Siddiqi, M.K., Malik, S., Chaturvedi, S.K., Uddin, M., and Khan, R.H. (2019). Elucidating the inhibitory potential of Vitamin A against fibrillation and amyloid associated cytotoxicity. *Int J Biol Macromol* *129*, 333-338.
- Furkan, M., Siddiqi, M.K., Zakariya, S.M., Khan, F.I., Hassan, M.I., and Khan, R.H. (2019). An In Vitro elucidation of the antiaggregatory potential of Diosminover thermally induced unfolding of hen egg white lysozyme; A preventive quest for lysozyme amyloidosis. *Int J Biol Macromol* *129*, 1015-1023.
- Kumagai, P.S., Martins, C.S., Sales, E.M., Rosa, H.V.D., Mendonça, D.C., Damalio, J.C.P., Spinozzi, F., Itri, R., and Araujo, A.P.U. (2019). Correct partner makes the difference: Septin G-interface plays a critical role in amyloid formation. *Int J Biol Macromol* *133*, 428-435.
- Majid, N., Siddiqi, M.K., Khan, A.N., Shabnam, S., Malik, S., Alam, A., Uversky, V.N., and Khan, R.H. (2019). Biophysical Elucidation of Amyloid Fibrillation Inhibition and Prevention of Secondary Nucleation by Cholic Acid: An Unexplored Function of Cholic Acid. *ACS Chem Neurosci* *10*, 4704-4715.
